# Supplementary material for: Selected by gene co-expression network and molecular docking analyses, ENMD-2076 is highly effective in glioblastoma-bearing rats
Source: publisher site journal article supplement (doi:10.18632/aging.102422), 2019-11-09
Supplement: Supplementary file [file aging-v11i21-102422-supplementary-material-SD2.pdf]

**SUPPLEMENTARY TABLES**

**Supplementary Table 1. Detailed information of the hub genes in blue module.**

| Gene symbol | Degree | Betweenness | Gene symbol | Degree | Betweenness |
|-------------|--------|-------------|-------------|--------|-------------|
| TOP2A       | 79     | 0.159972    | KIF23       | 57     | 0.008236    |
| CDK1        | 65     | 0.038539    | RRM2        | 57     | 0.018541    |
| BIRC5       | 62     | 0.034136    | FOXM1       | 57     | 0.023411    |
| NDC80       | 60     | 0.024477    | AURKA       | 56     | 0.005829    |
| TTK         | 59     | 0.010768    | CCNB2       | 56     | 0.013458    |
| BUB1B       | 58     | 0.016069    | AURKB       | 56     | 0.006843    |
| DLGAP5      | 58     | 0.008631    | CEP55       | 56     | 0.01069     |
| CDC20       | 57     | 0.018397    | MELK        | 56     | 0.007731    |
| BUB1        | 57     | 6.82E-04    | CHEK1       | 55     | 0.007047    |
| KIF11       | 57     | 0.003164    | PBK         | 55     | 0.007265    |

**Supplementary Table 2. Functional and pathway enrichment analysis of MCODE identified genes.**

| Module | Term                                | Count | P Value  | FDR      | Genes                                                                                                                                                                                      |
|--------|-------------------------------------|-------|----------|----------|--------------------------------------------------------------------------------------------------------------------------------------------------------------------------------------------|
| 1      | GO:0000279~M phase                  | 28    | 2.44E-32 | 3.41E-29 | KIF23, TTK, CHEK1, AURKA, CEP55, AURKB, KIF2C, OIP5, BUB1, ASPM, CDK1, KIF11, MKI67, DLGAP5, KIF15, NUF2, TPX2, CENPF, NUSAP1, ESPL1, BIRC5, CENPE, NDC80, CDC20, PBK, UBE2C, CCNB2, BUB1B |
|        | GO:0000280~nuclear division         | 25    | 1.86E-31 | 2.59E-28 | KIF23, CDK1, KIF11, DLGAP5, KIF15, TPX2, NUF2, CENPF, NUSAP1, ESPL1, AURKA, NDC80, CDC20, CENPE, BIRC5, AURKB, PBK, CEP55, UBE2C, KIF2C, CCNB2, OIP5, BUB1, BUB1B, ASPM                    |
|        | GO:0007067~mitosis                  | 25    | 1.86E-31 | 2.59E-28 | KIF23, CDK1, KIF11, DLGAP5, KIF15, TPX2, NUF2, CENPF, NUSAP1, ESPL1, AURKA, NDC80, CDC20, CENPE, BIRC5, AURKB, PBK, CEP55, UBE2C, KIF2C, CCNB2, OIP5, BUB1, BUB1B, ASPM                    |
| 2      | GO:0004890~GABA-A receptor activity | 9     | 2.17E-17 | 2.54E-14 | GABRD, GABRG1, GABRG2, GABRA2, GABRA1, GABRA4, GABRB2, GABRB1, GABRA5                                                                                                                      |
|        | GO:0016917~GABA receptor activity   | 9     | 2.10E-16 | 2.55E-13 | GABRD, GABRG1, GABRG2, GABRA2, GABRA1, GABRA4, GABRB2, GABRB1, GABRA5                                                                                                                      |
|        | GO:0034707~chloride                 | 10    | 3.37E-15 | 3.59E-12 | GABRD, GABRG1, FXYD1, GABRG2, GABRA2, GABRA1, GABRA4, GABRB2, GABRB1, GABRA5                                                                                                               |

**Supplementary Table 3. ADMET (Adsorption, Distribution, Metabolism and Excretion) and toxicity properties of compounds.**

| Number | Compounds    | BBB level <sup>a</sup> | Absorption <sup>b</sup> | Solubility <sup>c</sup> | Hepatotoxicity <sup>d</sup> | CYP2D6 <sup>e</sup> | PPB Level <sup>f</sup> |
|--------|--------------|------------------------|-------------------------|-------------------------|-----------------------------|---------------------|------------------------|
| 1      | ZINC03918087 | 4                      | 3                       | 2                       | 1                           | 0                   | 0                      |
| 2      | ZINC58661275 | 3                      | 0                       | 2                       | 0                           | 1                   | 0                      |
| 3      | ZINC06718723 | 3                      | 0                       | 3                       | 0                           | 0                   | 1                      |
| 4      | ZINC34885047 | 2                      | 0                       | 3                       | 0                           | 1                   | 0                      |
| 5      | ZINC15449300 | 4                      | 3                       | 2                       | 1                           | 0                   | 0                      |
| 6      | ZINC34842284 | 4                      | 0                       | 3                       | 1                           | 0                   | 2                      |
| 7      | ZINC13643145 | 3                      | 0                       | 3                       | 0                           | 0                   | 2                      |
| 8      | ZINC28824607 | 3                      | 0                       | 2                       | 0                           | 1                   | 0                      |
| 9      | ZINC14951647 | 3                      | 0                       | 3                       | 0                           | 0                   | 1                      |
| 10     | ZINC28714095 | 4                      | 1                       | 2                       | 1                           | 1                   | 2                      |
| 11     | ZINC03814434 | 2                      | 0                       | 1                       | 1                           | 1                   | 2                      |
| 12     | ZINC43129461 | 4                      | 3                       | 3                       | 1                           | 0                   | 0                      |
| 13     | ZINC03939511 | 4                      | 0                       | 1                       | 1                           | 0                   | 1                      |
| 14     | ZINC72178031 | 4                      | 0                       | 3                       | 0                           | 0                   | 2                      |
| 15     | ZINC06718665 | 3                      | 0                       | 3                       | 0                           | 0                   | 2                      |
| 16     | ZINC38995988 | 3                      | 0                       | 3                       | 0                           | 0                   | 0                      |
| 17     | ZINC16697102 | 4                      | 0                       | 3                       | 1                           | 0                   | 0                      |
| 18     | ZINC35880991 | 4                      | 2                       | 1                       | 1                           | 0                   | 2                      |
| 19     | ZINC00988000 | 4                      | 1                       | 1                       | 1                           | 1                   | 2                      |
| 20     | ZINC58660958 | 3                      | 0                       | 3                       | 0                           | 0                   | 0                      |

<sup>a</sup>Blood Brain Barrier level: 0 (Very high penetrant); 1 (High); 2 (Medium); 3 (Low); 4 (Undefined); <sup>b</sup>Human intestinal absorption level: 0 (good); 1 (moderate); 2 (poor); 3 (very poor); <sup>c</sup>Aqueous solubility level: 0 (extremely low); 1 (very low, but possible); 2 (low); 3 (good); <sup>d</sup>Hepatotoxicity: 0 (Nontoxic); 1 (Toxic); <sup>e</sup>Cytochrome P450 2D6 level: 0 (Non-inhibitor); 1 (Inhibitor); <sup>f</sup>Plasma Protein Binding: 0 (Binding is <90%); 1 (Binding is >90%); 2 (Binding is >95%).

| Toxicity properties of compounds |              |                        |       |                      |       |                   |                  |
|----------------------------------|--------------|------------------------|-------|----------------------|-------|-------------------|------------------|
| Number                           | Compounds    | Mouse NTP <sup>a</sup> |       | Rat NTP <sup>a</sup> |       | AMES <sup>b</sup> | DTP <sup>c</sup> |
|                                  |              | Female                 | Male  | Female               | Male  |                   |                  |
| 1                                | ZINC03918087 | 0                      | 1     | 1                    | 1     | 0                 | 1                |
| 2                                | ZINC58661275 | 0                      | 1     | 0                    | 0     | 1                 | 0                |
| 3                                | ZINC06718723 | 1                      | 0     | 0.067                | 1     | 0.998             | 0.965            |
| 4                                | ZINC34885047 | 0                      | 0     | 0                    | 0     | 1                 | 0                |
| 5                                | ZINC15449300 | 0                      | 1     | 1                    | 1     | 0                 | 1                |
| 6                                | ZINC34842284 | 1                      | 1     | 0.999                | 1     | 1                 | 1                |
| 7                                | ZINC13643145 | 0.501                  | 0     | 0                    | 1     | 1                 | 0.732            |
| 8                                | ZINC28824607 | 0.001                  | 0.995 | 0                    | 0.177 | 0                 | 0                |
| 9                                | ZINC14951647 | 1                      | 0     | 0.067                | 1     | 0.998             | 0.965            |
| 10                               | ZINC28714095 | 1                      | 0     | 0.779                | 0.514 | 0                 | 1                |
| 11                               | ZINC03814434 | 1                      | 0     | 0.003                | 0.543 | 0                 | 1                |
| 12                               | ZINC43129461 | 1                      | 1     | 0                    | 0.628 | 1                 | 0                |
| 13                               | ZINC03939511 | 1                      | 1     | 1                    | 0.973 | 1                 | 1                |
| 14                               | ZINC72178031 | 0.61                   | 0     | 0                    | 0     | 1                 | 0                |
| 15                               | ZINC06718665 | 0.002                  | 0     | 0                    | 1     | 1                 | 1                |
| 16                               | ZINC38995988 | 0.474                  | 1     | 0.169                | 0     | 0                 | 0.999            |
| 17                               | ZINC16697102 | 1                      | 1     | 0                    | 0.03  | 1                 | 0                |
| 18                               | ZINC35880991 | 1                      | 1     | 0                    | 0     | 0                 | 1                |
| 19                               | ZINC00988000 | 0                      | 0     | 0                    | 0     | 0                 | 0.983            |
| 20                               | ZINC58660958 | 1                      | 1     | 0                    | 0     | 0.997             | 0.001            |

<sup>a</sup>0 (Non-Carcinogen); 1 (Carcinogen); <sup>b</sup>0 (Non-Mutagen); 1 (Mutagen); <sup>c</sup>0 (Non-Toxic); 1 (Toxic).

**Supplementary Table 4. Hydrogen bond interaction and Pi interaction parameters for each compound and Aurora A kinase and VEGFR residues.**

| Receptor        | Compound | Donor Atom | Receptor Atom | Distance (Å) |
|-----------------|----------|------------|---------------|--------------|
| Aurora kinase A | ENMD     | ASN261:OD1 | ENMD-2076:H53 | 1.92         |
|                 |          | GLU211:O   | ENMD-2076:H51 | 2.59         |
| VEGFR-2         | ENMD     | ASP1046:O  | ENMD-2076:H54 | 3.08         |
|                 |          | ASP1046:O  | ENMD-2076:H48 | 2.93         |

  

| Pi interaction parameters for each ligand-receptor complex |           |            |               |            |           |            |           |               |
|------------------------------------------------------------|-----------|------------|---------------|------------|-----------|------------|-----------|---------------|
| Receptor                                                   | Compound  | Pi-Cation  |               | Pi-Sigma   |           | Pi-Alkyl   |           | Distances (Å) |
|                                                            |           | Donor Atom | Receptor      | Donor Atom | Receptor  | Donor Atom | Receptor  |               |
| Aurora kinase A                                            | ENMD-2076 | ASP274:OD2 | ENMD-2076:H53 |            |           |            |           | 2.00          |
|                                                            |           | ARG220:NH1 | ENMD-2076     |            | NA        |            | NA        | 3.62          |
|                                                            |           | ARG137:NH2 | ENMD-2076     |            |           |            |           |               |
| VEGFR-2                                                    | ENMD-2076 |            |               | VAL898:CG1 | ENMD-2076 |            |           | 3.81          |
|                                                            |           |            |               |            |           | VAL899     | ENMD-2076 | 5.20          |
|                                                            |           |            | NA            |            |           | VAL916     | ENMD-2076 | 5.35          |
|                                                            |           |            |               |            |           | LEU1019    | ENMD-2076 | 4.72          |
|                                                            |           |            |               |            |           | LEU889     | ENMD-2076 | 4.85          |

NA notes not available.
